# Supplementary material for: Preserving ester-linked modifications reveals glutamate and aspartate mono-ADP-ribosylation by PARP1 and its reversal by PARG
Source: PubMed Central journal article supplement (PMC11102441; doi:10.1038/s41467-024-48314-0), 2024-05-18
Supplement: 41467_2024_48314_MOESM1_ESM.pdf [file 41467_2024_48314_MOESM1_ESM.pdf]

## **SUPPLEMENTARY INFORMATION**

# **Preserving Ester-linked Modifications Reveals Glutamate and Aspartate mono-ADP-ribosylation by PARP1 and its Reversal by PARG**

Longarini and Matic

Supplementary Figures 1 – 7

**A**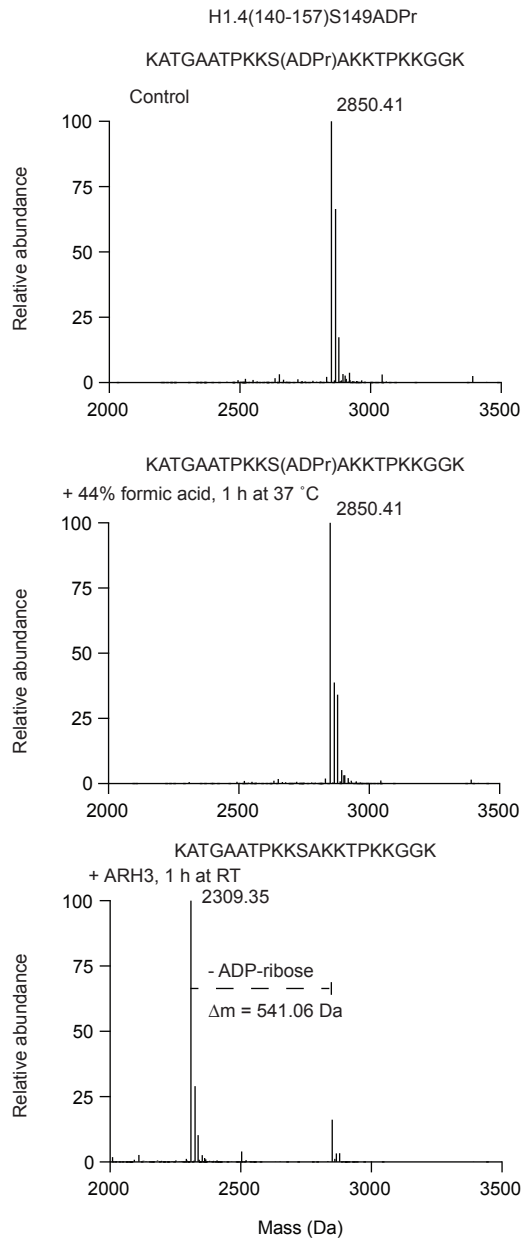**B**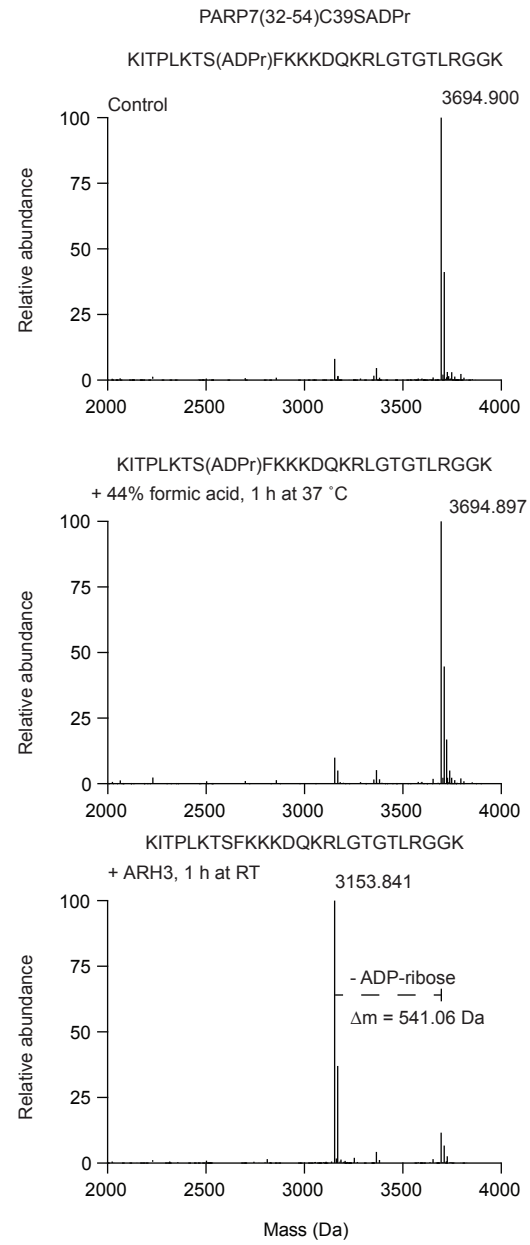

**Supp. Fig. 1: The high chemical stability of serine ADP-ribosylation.**

**a**, Deconvoluted MS spectra of biotinylated Histone H1.4 (140-157) S149 ADPribosylated peptide untreated (top), treated with 44 % formic acid in water for 1 h at 37 °C (middle) or treated with recombinant ARH3 for 1 h at RT (bottom). As depicted, the *in vitro* ARH3 reaction produces a mass shift of 541.06 Da, corresponding to the loss of ADPr. Conversely, no appreciable loss of ADPr is observed in the formic acid treated sample. **b**, Deconvoluted MS spectra of biotinylated PARP7 (32-54) C39S ADPribosylated peptide untreated (top), treated with 44 % formic acid in water for 1 h at 37 °C (middle) or treated with recombinant ARH3 for 1 h at RT (bottom). As depicted, the *in vitro* ARH3 reaction produces a mass shift of 541.06 Da, corresponding to the loss of ADPr. Conversely, no appreciable loss of ADPr is observed in the formic acid treated sample.

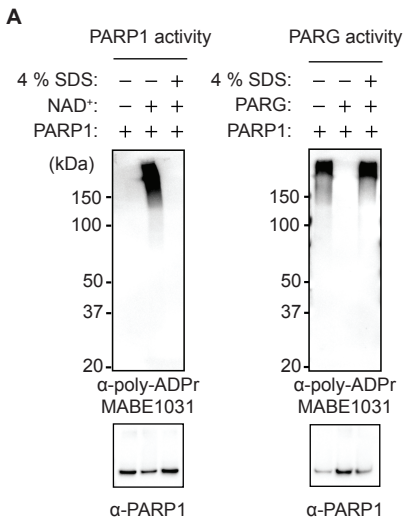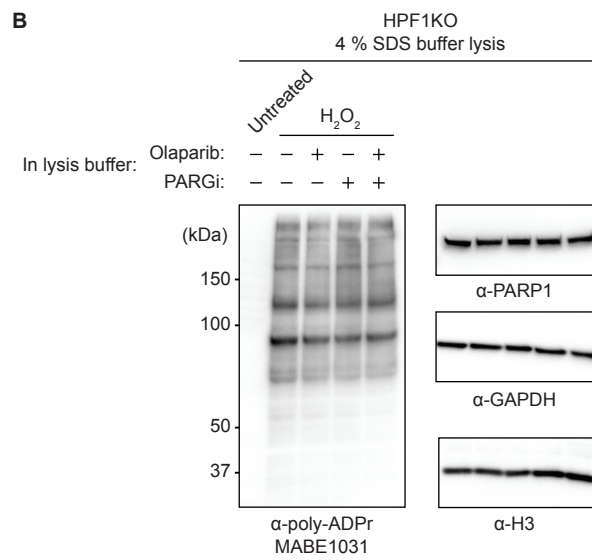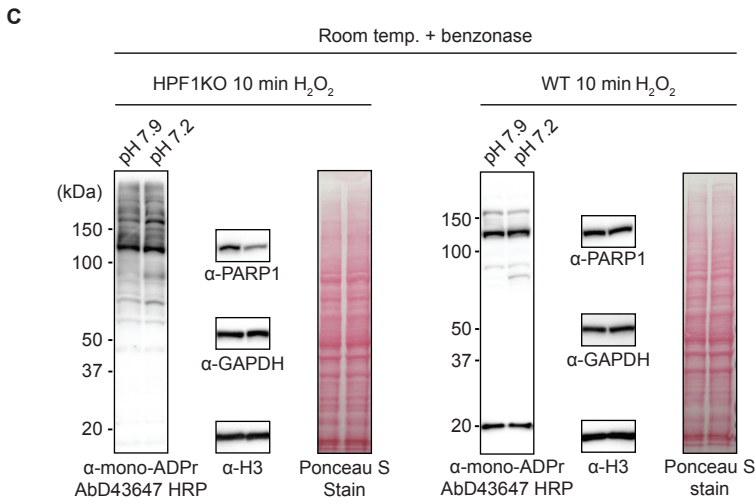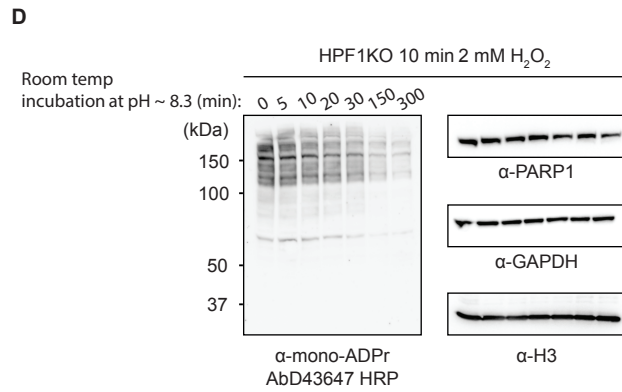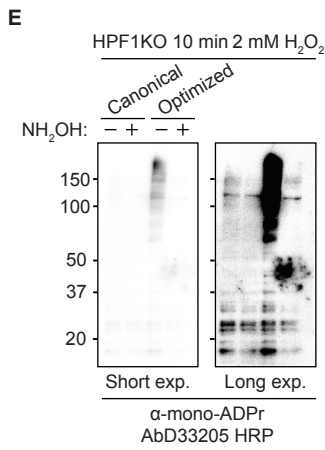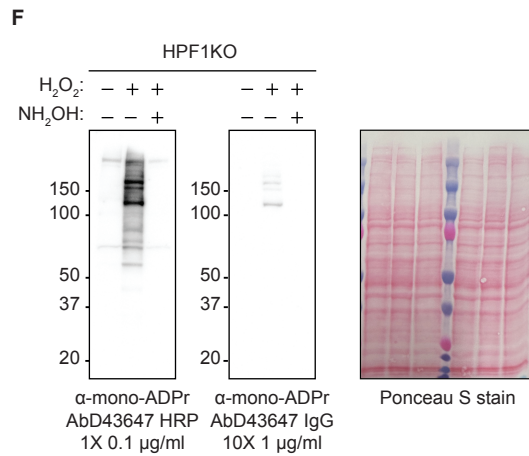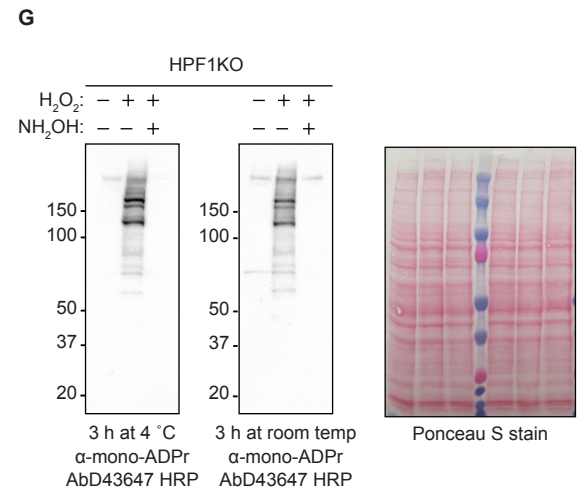



**Supp. Fig. 2: Preservation of ester-linked modifications reveals DNA damage-induced mono-Asp/Glu-ADPr.**

**a**, Immunoblotting images showing the effect of the denaturing agent SDS on recombinant PARP1 and PARG. Left: PARP1 was automodified as described in the Methods and incubated in the presence or absence of 4% SDS for 30 min, then immunoblotted with the indicated antibodies. Right: Automodified PARP1, inhibited by Olaparib, was incubated with PARG and 4 % SDS, as indicated, for 30 minutes. Shown a representative of two independent experiments. **b**, HPF1KO cells were treated with H<sub>2</sub>O<sub>2</sub>, then harvested and lysed at room temperature with lysis buffer containing 4 % SDS and, where indicated, PARP1 and PARG inhibitors. Shown is a representative of two independent experiments. **c**, Immunoblotting images showing the effect of pH during sample processing on mono-ADPr signal. HPF1KO U2OS cells were treated with 2 mM H<sub>2</sub>O<sub>2</sub> for 10 min, followed by harvesting and lysis at pH 7.9 or 7.2 (4 % SDS, 50 mM HEPES pH 7.2 or 7.9, 150 mM NaCl, 5 mM MgCl<sub>2</sub>), processed at room temperature and treated with benzonase, followed by immunoblotting with the indicated antibodies and stained with Ponceau S to show total protein load. Shown is a representative of four independent experiments. **d**, Immunoblotting images showing the effect of pH upon addition of 1X NuPAGE LDS sample loading buffer (4X NuPAGE buffer has a pH of 8.5, resulting in a final sample pH of approximately 8.3 when added as 1X final concentration in pH 7.2 lysis buffer) and incubation at room temperature for the indicated times before loading for SDS-PAGE gel. Shown is a representative of three independent experiments. **e**, Related to Fig. 2c, the same samples were also stained with the AbD33205 HRP anti-mono-ADPr antibody, shown here. **f**, Immunoblotting images showing comparison between IgG and HRP-coupled formats for the AbD43647 antibody. 10-fold higher amounts of IgG antibody (1 µg/ml for IgG format and 0.1 µg/ml for HRP format, MW for both at approx. 200 kDa). Both membranes derive from the same samples and were processed and imaged together, with the exception of the antibody incubation step. **g**, HPF1KO U2OS samples were treated and immunoblotted as indicated. After overnight incubation with AbD43647, the membrane was washed in PBS-T, then cut in two. One membrane was further incubated for 3 h at room temp. in PBS-T, while the other membrane was kept at 4 °C for the same amount of time. Following incubation, both membranes were imaged together. Both membranes derive from the same samples and were processed together with the exception of the antibody incubation step. For **f**, **g** shown is a representative of two independent experiments.

**A**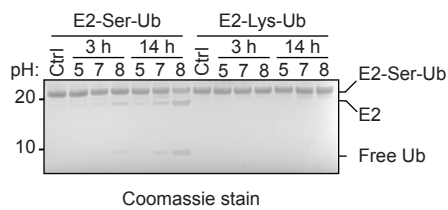**B**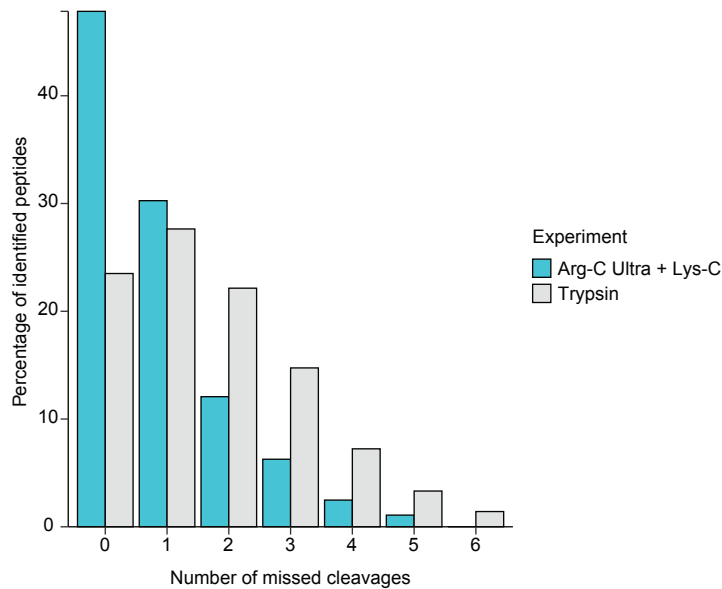**C**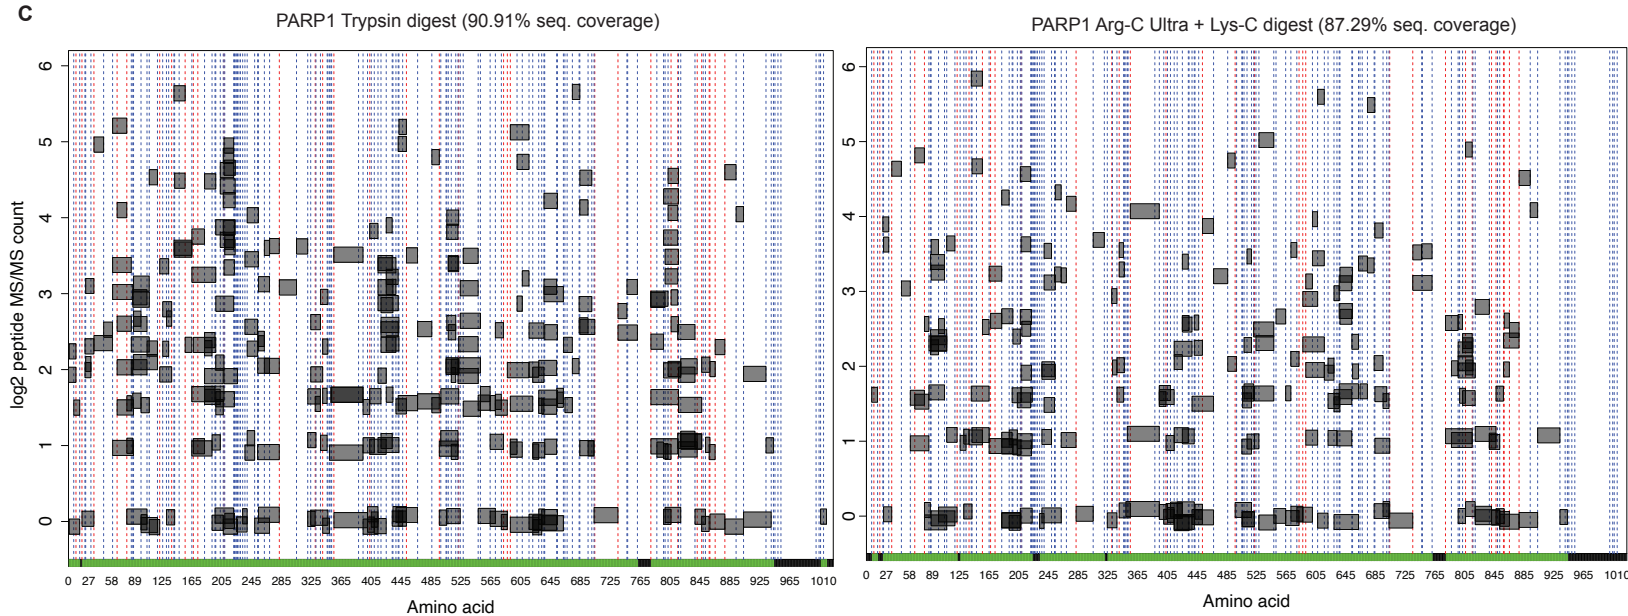**D**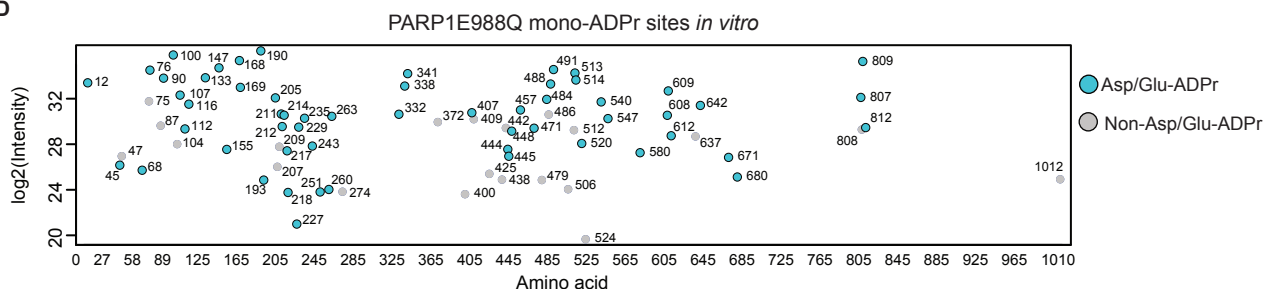**E**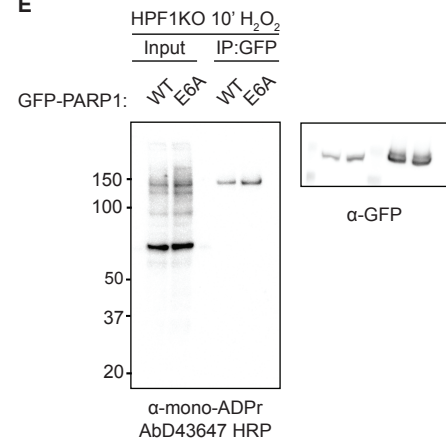**F**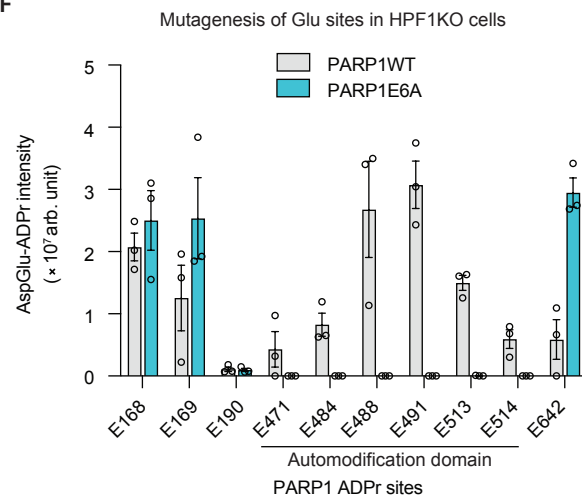**G**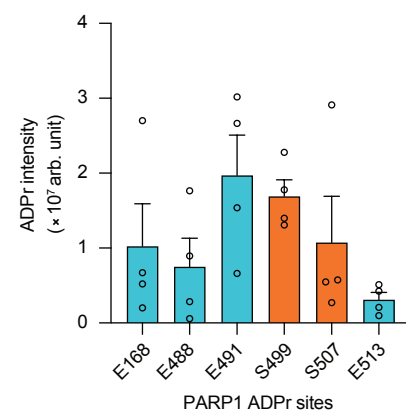

**Supp. Fig. 3: Short acidic protein digestion with Arg-C Ultra preserves mono-Asp/GluADPr for proteomic analyses.**

**a**, SDS-PAGE showing hydrolysis of serine-linked ubiquitination across a spectrum of incubation conditions for protease digestion. Recombinant UBE2D3 S22R C85S (E2) is linked to the C-terminus of ubiquitin (Ub) with the C85S residue. UBE2D3 S22R C85K linked to the C-term of Ub with a canonical isopeptide bond was used as a control. Each E2~Ub construct was incubated at 37°C for 3 h or 14 h at pH 5 (20 mM sodium acetate), pH 7 (20 mM HEPES), or pH 8 (20 mM TRIS-HCl), run on SDS-PAGE gel and visualized with Coomassie stain. Shown is a representative of two independent experiments. **b**, percentage of missed cleavages from LC-MS/MS analyses of recombinant PARP1E988Q samples digested with standard “Trypsin” or with our optimized “Arg-C Ultra + Lys-C” protocol (see Fig. 3a). **c**, Schematic illustration of PARP1E988Q sequence coverage. Left: “Trypsin” processed sample, right: “Arg-C Ultra + Lys-C” sample. Each grey bar represents an identified peptide along the corresponding PARP1 sequence (x-axis) and at a given number of MS/MS spectral counts (y-axis). **d**, Recombinant PARP1E988Q was automodified and then digested with the optimized digestion protocol, followed by mass-spectrometry analysis. The scatterplot depicts the log<sub>2</sub> Intensity of identified Asp/Glu-ADPr sites (in cyan) or non-Asp/Glu-ADPr sites (in grey) plotted as a function of their relative position across the PARP1 sequence. **e**, Immunoblotting images of GFP-PARP1 pulldown. WT or E6A (E471A, E484A, E491A, E513A, E514A) PARP1 was immunoprecipitated with a stringent protocol involving urea washes that generates a highly pure eluate, then immunoblotted with the indicated antibodies. **f**, As in Supplementary Fig. 3e, GFP-PARP1 WT or E6A mutant was immunoprecipitated with a highly stringent protocol, digested with the optimized protocol, and subjected to mass-spectrometry analysis. Bar plot ± SEM of the ADPr intensity of each modified site, showing that while in the PARP1E6A mutant there is no automodification on the E471A, E484A, E491A, E513A, E514A sites, this is accompanied by a corresponding increase in ADPr status of E168, E169 and E642. n = 3 independent replicates shown as individual dots. **g**, Bar plot ± SEM of the ADPr intensity of each modified site, from GFP-PARP1 pulldown in WT cells treated with H<sub>2</sub>O<sub>2</sub> for 10 minutes. n = 4 independent replicates shown as individual dots

**A**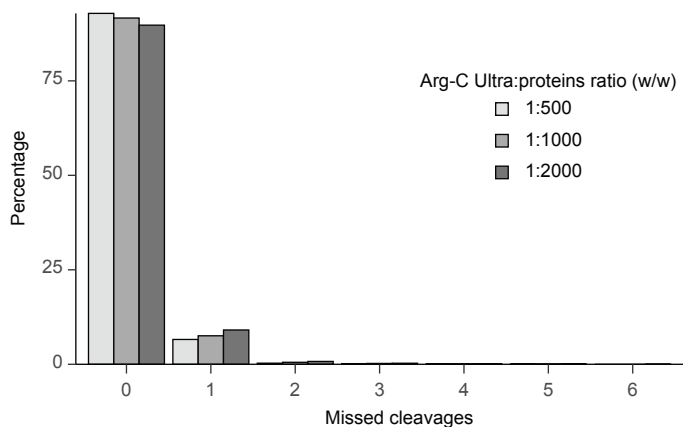**B**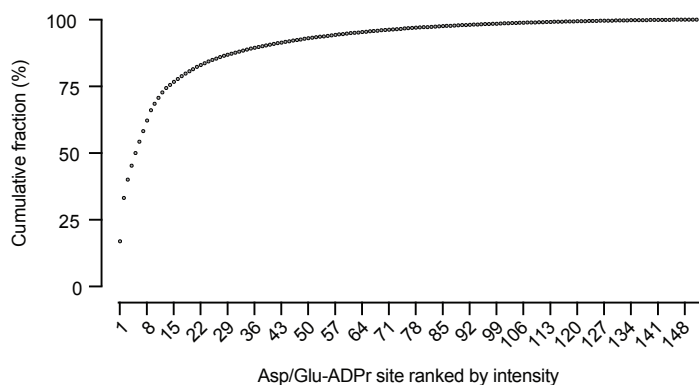**C**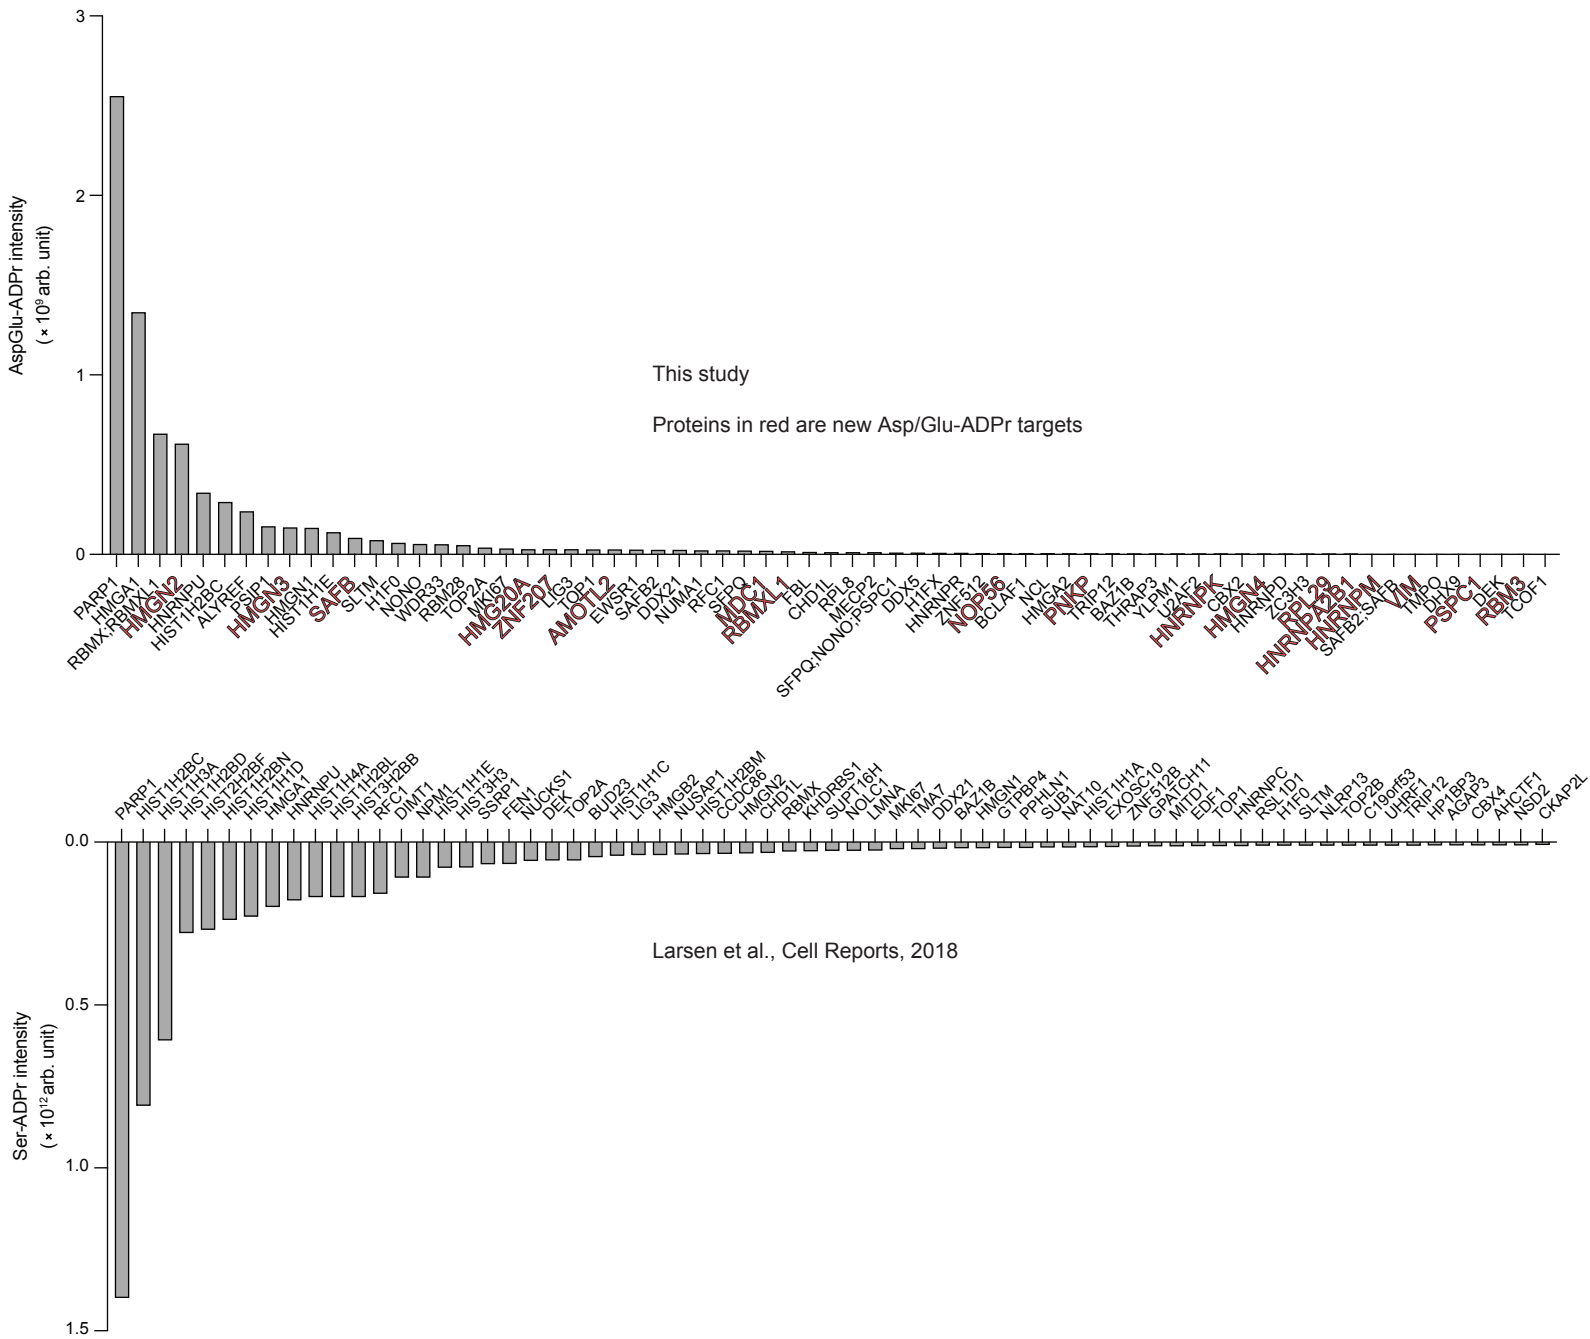

**Supp. Fig. 4: Identification of mono-Asp/Glu-ADPr on additional targets through ester bond preservation**

**a**, Percentage of missed cleavages from LC-MS/MS analyses of whole-cell lysates samples digested with varying ratios (w/w protease-to-protein ratio) of Arg-C Ultra for 3 h at 37 °C in acidic buffer (20 mM sodium acetate pH 5.1, 5 mM DTT). n = 3 independent experiments. **b**, Asp/Glu-ADPr sites identified in our study ranked by cumulative intensity. **c**, Top: complete list of mono-Asp/Glu-ADP-ribosylated proteins identified in our study, ranked by the cumulative intensity of the ADPr sites. The proteins highlighted in red have not been previously identified as Asp/Glu-ADPr targets in large-scale ADPr studies. Bottom: data derived from Larsen et al., Cell Reports, 2018, list of top Ser-ADP-ribosylated proteins ranked by cumulative intensity. Most Asp/Glu-ADPr targets are also Ser-ADPr targets. The data shown in b, c derives from the same experiments shown in Fig. 4.

**A**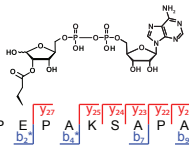

- P E P A Y2 Y4 Y6 Y8 Y10 Y12 Y14 Y16 Y18 Y20 Y22 Y24 Y26 Y28 Y30 Y32 Y34 Y36 Y38 Y40 Y42 Y44 Y46 Y48 Y50 Y52 Y54 Y56 Y58 Y60 Y62 Y64 Y66 Y68 Y70 Y72 Y74 Y76 Y78 Y80 Y82 Y84 Y86 Y88 Y90 Y92 Y94 Y96 Y98 Y100 -

H2BE2ADPr HCD spectrum

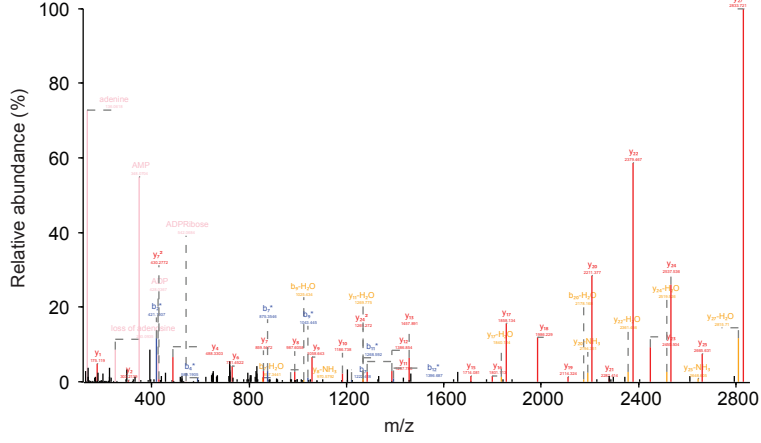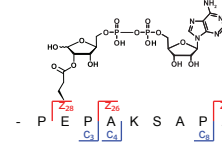

- P E P A Z26 Z28 Z30 Z32 Z34 Z36 Z38 Z40 Z42 Z44 Z46 Z48 Z50 Z52 Z54 Z56 Z58 Z60 Z62 Z64 Z66 Z68 Z70 Z72 Z74 Z76 Z78 Z80 Z82 Z84 Z86 Z88 Z90 Z92 Z94 Z96 Z98 Z100 -

H2BE2ADPr ETD spectrum

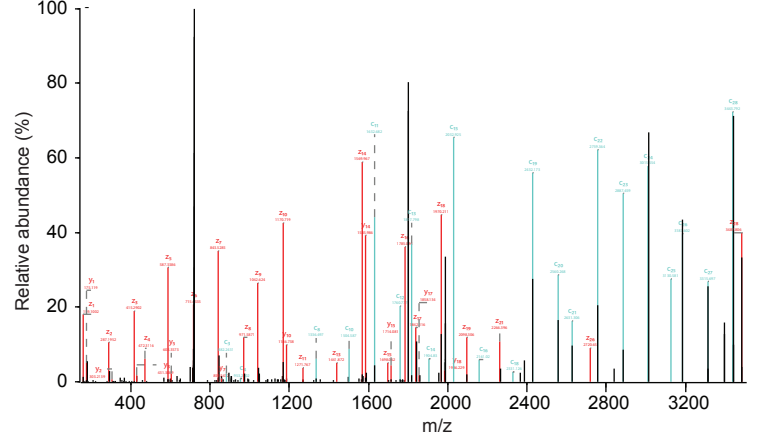**B**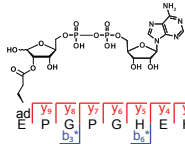

- F Y6 Y8 Y10 Y12 Y14 Y16 Y18 Y20 Y22 Y24 Y26 Y28 Y30 Y32 Y34 Y36 Y38 Y40 Y42 Y44 Y46 Y48 Y50 Y52 Y54 Y56 Y58 Y60 Y62 Y64 Y66 Y68 Y70 Y72 Y74 Y76 Y78 Y80 Y82 Y84 Y86 Y88 Y90 Y92 Y94 Y96 Y98 Y100 -

WDR33E1187ADPr HCD spectrum

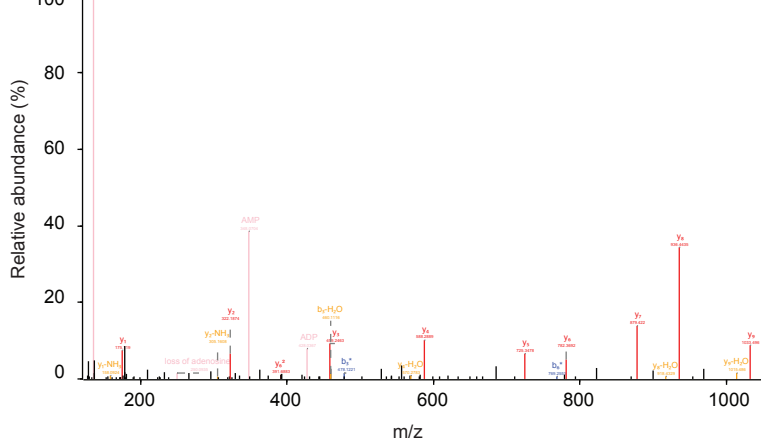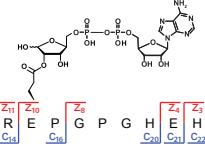

- F Z26 Z28 Z30 Z32 Z34 Z36 Z38 Z40 Z42 Z44 Z46 Z48 Z50 Z52 Z54 Z56 Z58 Z60 Z62 Z64 Z66 Z68 Z70 Z72 Z74 Z76 Z78 Z80 Z82 Z84 Z86 Z88 Z90 Z92 Z94 Z96 Z98 Z100 -

WDR33E1187ADPr ETD spectrum

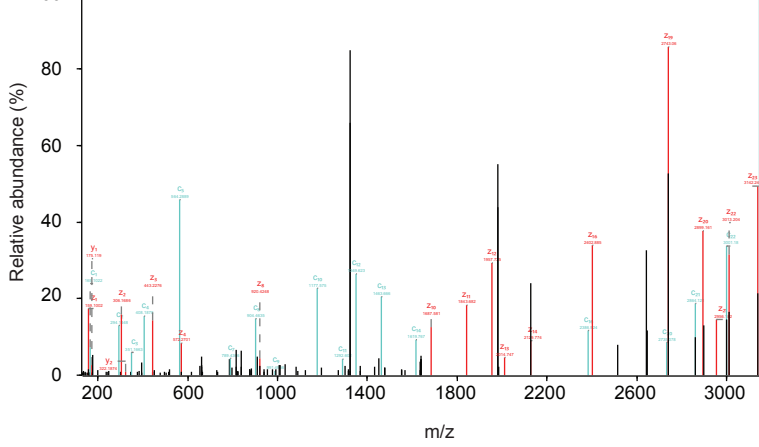**C**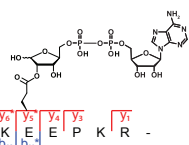

- K Y14 Y16 Y18 Y20 Y22 Y24 Y26 Y28 Y30 Y32 Y34 Y36 Y38 Y40 Y42 Y44 Y46 Y48 Y50 Y52 Y54 Y56 Y58 Y60 Y62 Y64 Y66 Y68 Y70 Y72 Y74 Y76 Y78 Y80 Y82 Y84 Y86 Y88 Y90 Y92 Y94 Y96 Y98 Y100 -

HMG1E15ADPr HCD spectrum

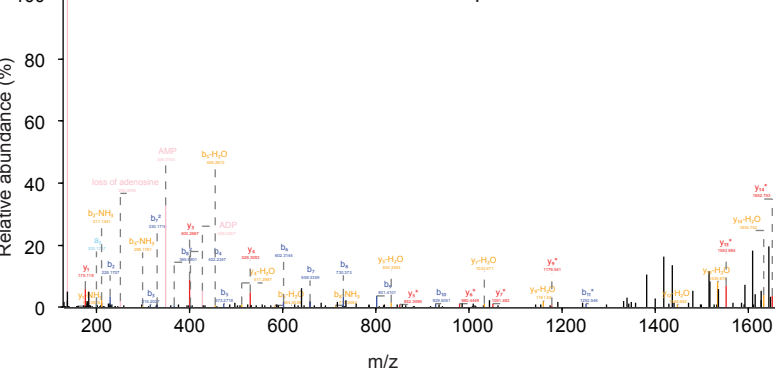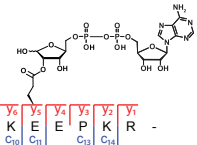

- K Z14 Z16 Z18 Z20 Z22 Z24 Z26 Z28 Z30 Z32 Z34 Z36 Z38 Z40 Z42 Z44 Z46 Z48 Z50 Z52 Z54 Z56 Z58 Z60 Z62 Z64 Z66 Z68 Z70 Z72 Z74 Z76 Z78 Z80 Z82 Z84 Z86 Z88 Z90 Z92 Z94 Z96 Z98 Z100 -

HMG1E15ADPr ETD spectrum

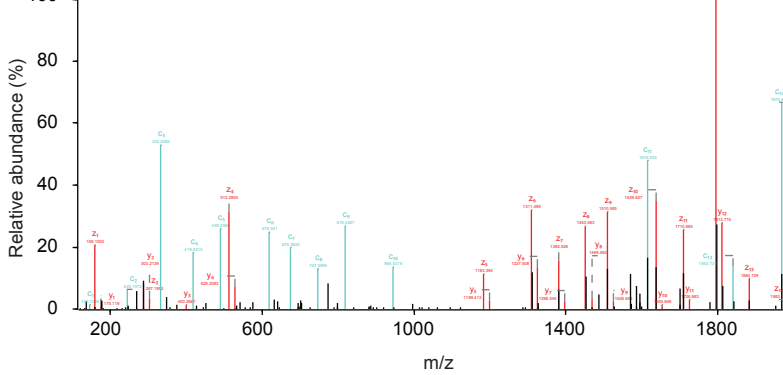

**Supp. Fig. 5: ETD and HCD spectra of ADP-ribosylated peptides identified upon mono-ADPr enrichment**

**a-c**, Left: high-resolution High-energy Collisional Dissociation (HCD) spectra; right: high-resolution Electron-Transfer Dissociation (ETD) spectra for **a**, H2BE2ADPr **b**, WDR33E1187ADPr **c**, HMGN1E15ADPr. HCD fragmentation of the Asp/Glu-ADPr peptide leads to loss of AMP ( $\Delta_{\text{mass}} = - 347.06$  Da) and leaves phosphoribose-H<sub>2</sub>O ( $\Delta_{\text{mass}} = 193.998$ ) as a diagnostic fragment that can be used to identify the site of ADPr-ribosylation. In ETD fragmentation the full ADP-ribose is preserved on the fragment ions ( $\Delta_{\text{mass}} = + 541.062$  Da). Data from the same experiments shown in Fig. 4.

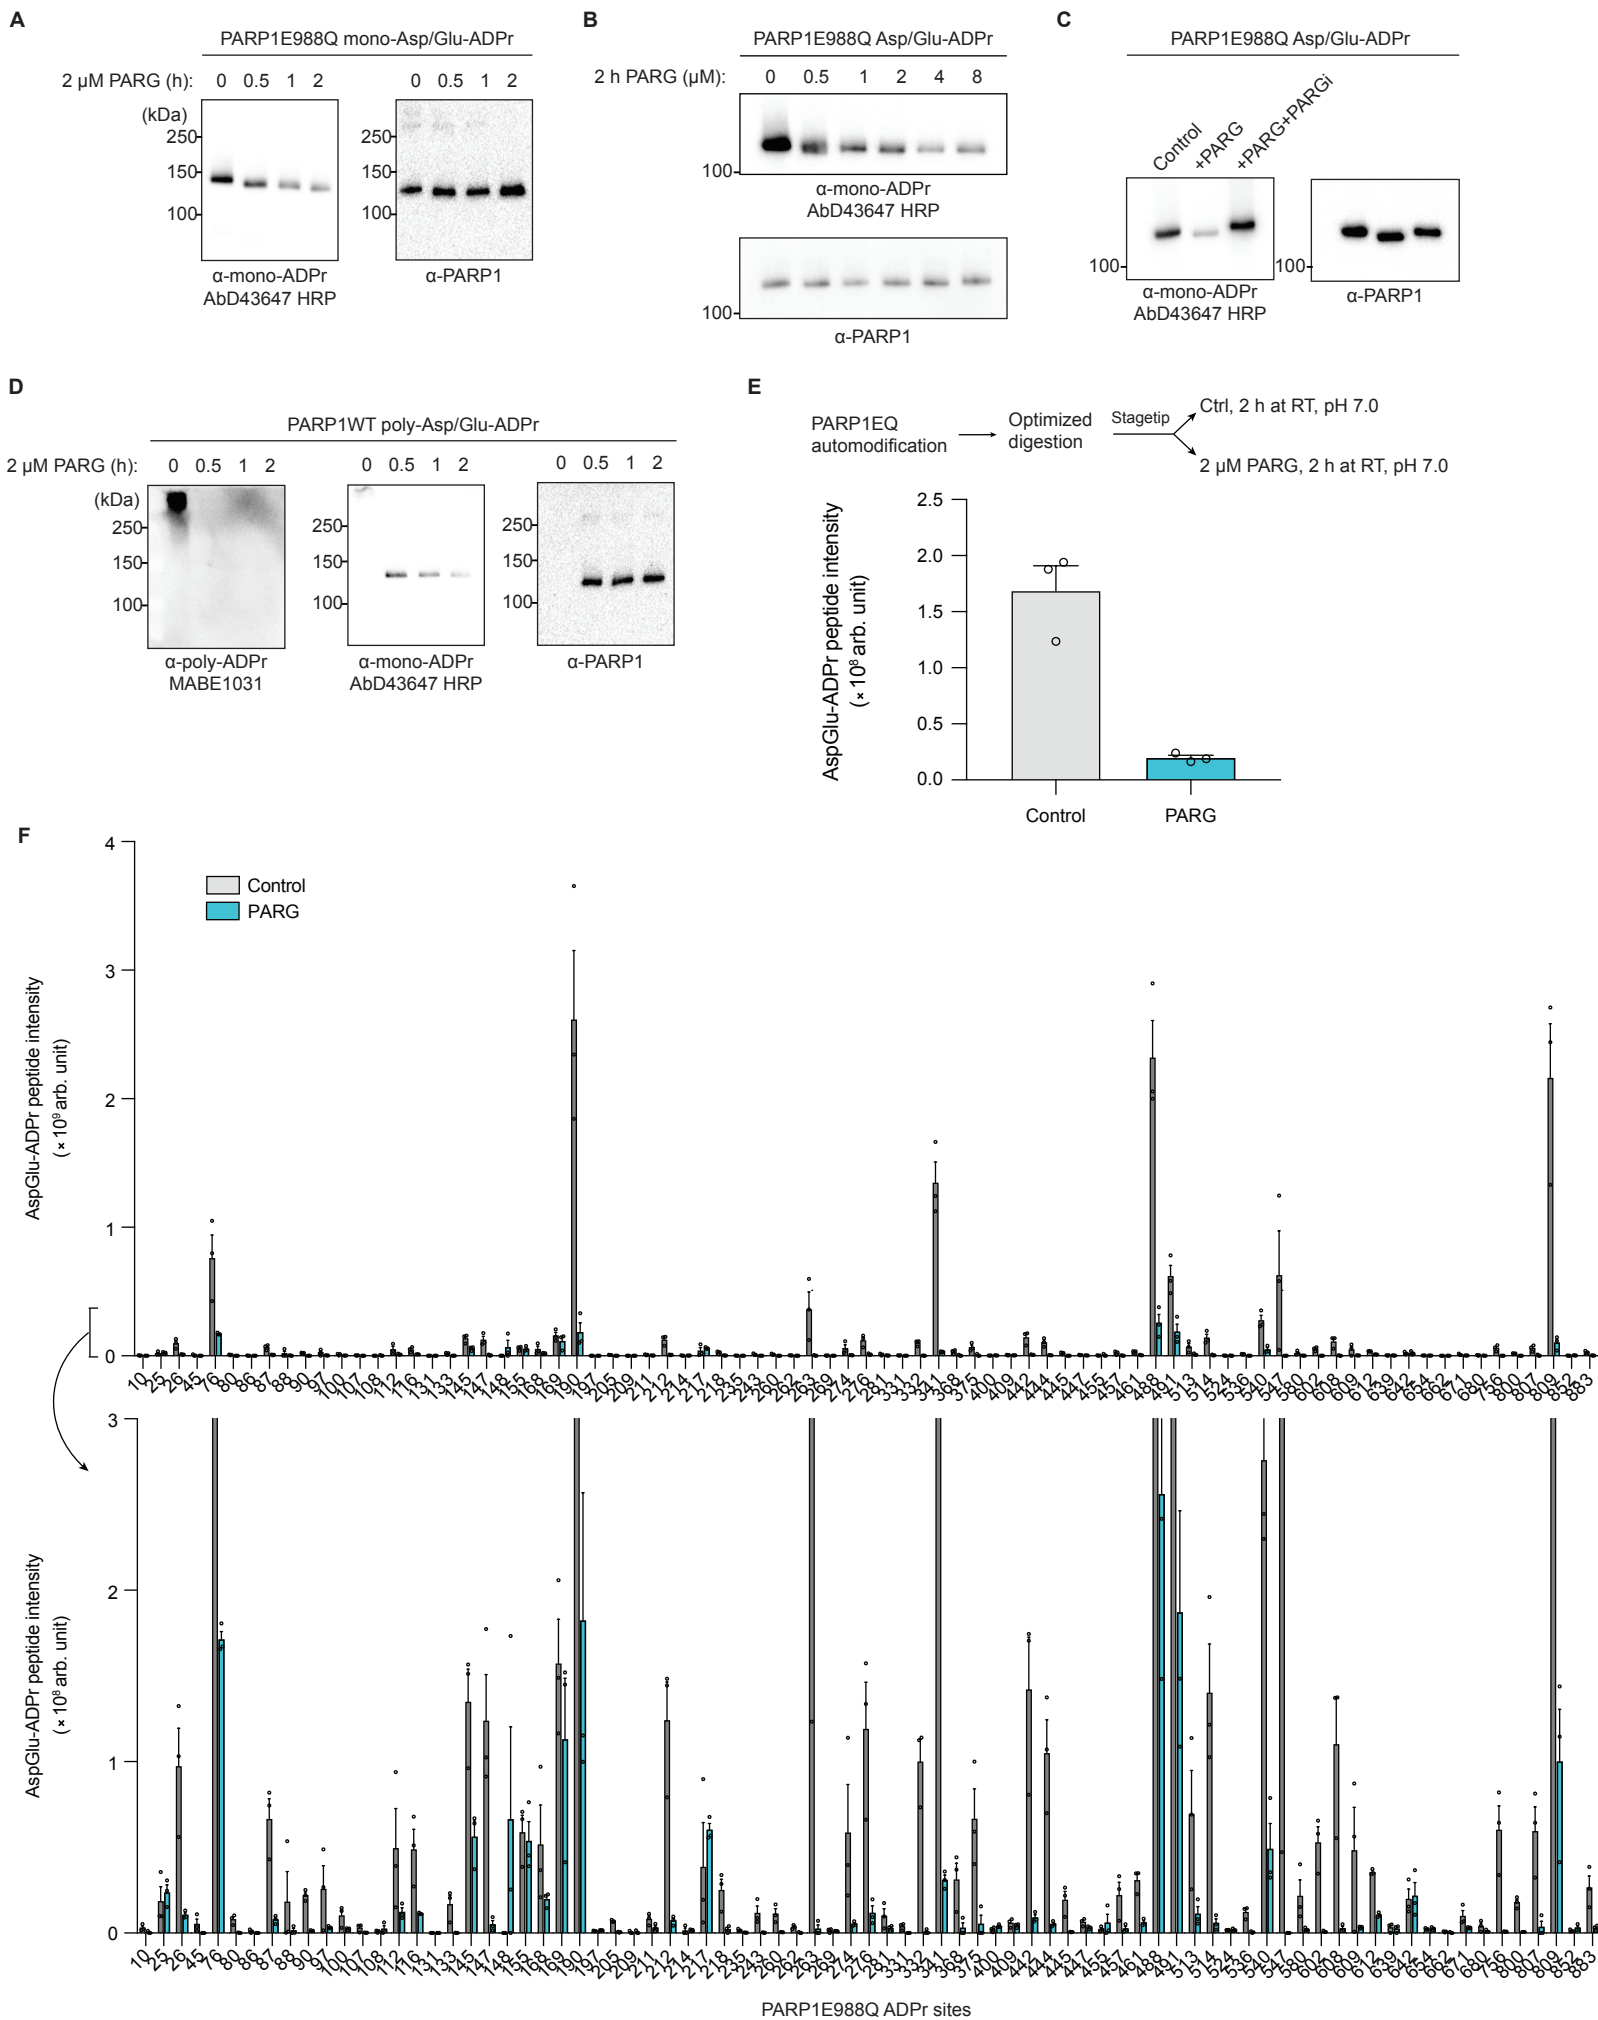



**Supp. Fig. 6: Human PARG can hydrolyse mono-Asp/Glu-ADPr in cells.**

**a**, Automodified PARP1E988Q was incubated with Olaparib and 2  $\mu$ M recombinant PARG for the indicated times, then subjected to immunoblotting with the indicated antibodies. **b**, Automodified PARP1E988Q was incubated with recombinant PARG for 2 h at the indicated concentration, then subjected to immunoblotting with the indicated antibodies. **c**, Automodified PARP1E988Q was incubated with 2  $\mu$ M recombinant PARG for 2 h with or without PARGi (PDD00017273, Sigma), then subjected to immunoblotting with the indicated antibodies. **d**, Poly-Asp/Glu-ADPr-ribosylated PARP1 (WT) was incubated with Olaparib and 2  $\mu$ M PARG for the indicated times, then subjected to immunoblotting with the indicated antibodies. **e**, Top: schematic of the experimental setup. PARP1E988Q was automodified, then digested according to the optimized digestion protocol. The resulting peptides were stagetipped, then treated with or without 0.5  $\mu$ M recombinant PARG for 2 h at room temp. PARG treatment of intact PARP1E988Q, before digestion, would lead to large amounts of PARG peptides upon digestion, which would significantly compromise the analysis of ADPr peptides. Bottom: average ADPr intensity  $\pm$  SEM for the peptides identified in the ctrl and PARG-treated samples. See also related Supplementary Fig. 6f.  $n = 3$  independent experiments shown as individual dots. **f**, Same experiment as in Supplementary Fig. 6e, showing the intensity  $\pm$  SEM for each high-confidence identified ADPr site in ctrl and PARG treatment samples. Bottom: zoomed-in plot in the intensity range 0 to  $3e^8$  to visualize low-abundance sites.  $n = 3$  independent experiments shown as individual dots. For all experiments **a-f**, to control for chemical hydrolysis of Asp/Glu-ADPr both control and PARG-treated samples were incubated together for the same total processing time. Shown is a representative of three independent replicates.

**A**

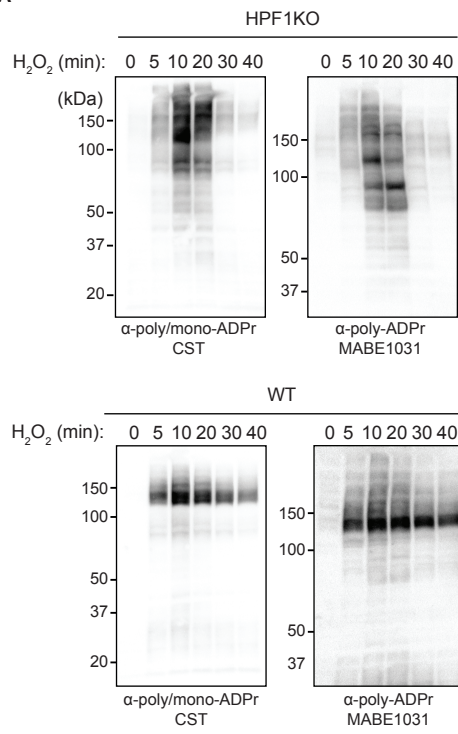

**Supp. Fig. 7: Mono-Asp/Glu-ADPr belongs to the initial wave of PARP1 signaling.**

**a**, Related to Figure 7a, the same samples were also stained with antibodies against poly/mono-ADPr (E6F6A, Cell Signaling Technology) and poly-ADPr (MABE1031, Millipore).
